# 1 **The assembled Banana dihaploid mitochondrial genome is compact** 2 **with a high number of gene copies**

3 Shruthy Priya Prakash<sup>1</sup>, Vaidheki Chandrasekar<sup>1</sup>, Selvi Subramanian<sup>1\*</sup>, Rahamatthunnisha Ummar<sup>1</sup>

4 <sup>1</sup>PSG College of Technology, Department of Biotechnology, Coimbatore, Tamil Nadu, India 641004.

5 Email ID: [selvi.bio@psgtech.ac.in](mailto:selvi.bio@psgtech.ac.in) ORCID:Orcid.org/0000-0003-4061-0973

6 \*Corresponding author

## 7 **ABSTRACT**

8 Banana being a major food crop all around the world, attracts various research interests in crop improvement. In  
9 banana, complete genome sequences of *Musa accuminata* and *Musa balbisiana* are available. However, the  
10 mitochondrial genome is not sequenced or assembled. Mitochondrial (mt) genes play an important role in flower and  
11 seed development and in Cytoplasmic Male Sterility. Unraveling banana mt genome architecture will be a  
12 foundation for understanding inheritance of traits and their evolution. In this study, the complete banana mt genome  
13 is assembled from the whole genome sequence data of the *Musa acuminata subsp. malaccensis* DH-Pahang. The mt  
14 genome sequence acquired by this approach was 409574 bp and it contains, 54 genes coding for 25 respiratory  
15 complex proteins 15 ribosomal proteins, 12 tRNA genes and two ribosomal RNA gene. Except atpB, rps11 and  
16 rps19 other genes are in multiple copies. The copy number is 12 in tRNA genes. In addition, nearly 25% tandem  
17 repeats are also present in it. These mt proteins are identical to the mt proteins present in the other members of AA  
18 genome and share 98% sequence similarity with *M. balbisiana*. The C to U RNA editing is profoundly higher (87 vs  
19 13%) in transcripts of *M. balbisiana* (BB) compared to *M. accuminata* (AA). The banana AA mitochondrial genome  
20 is tightly packed with 233 genes, with less rearrangements and just 5.3% chloroplast DNA in it. The maintenance of  
21 high copy number of functional mt genes suggest that they have a crucial role in the evolution of banana.

22 **Key words:** Mitochondrial genome, *Musa acuminata*, DH Pahang, genome assembly, RNA editing, mitochondrial  
23 genes

## 24 **INTRODUCTION**

25 The genomes of present day cultivated bananas consist of either diploids, triploids or tetraploids of AA (*Musa*  
26 *acuminata*), BB (*M. balbisiana*) and combination of both (AB). The mitochondrial (mt) genome of banana is not  
27 sequenced/assembled to date. The available AA genomic (D'Hont et al 2012) and BB genomic (Wang et al. 2019)  
28 sequence resources help to reconstitute the mt genomes. NOVOPlasty is a *denovo* organellar genome assembly tool  
29 which uses Whole Genome Shotgun (WGS) sequences to assemble circular organellar genomes (Dierckxsens et al.  
30 2017). This program was tested to assemble the mt genomes of model plants rice and Arabidopsis and gave 99.9%  
31 accuracy. Norgal (de Novo ORGAnellar DNA extractor) is one another pipeline available to extract the organellar DNA  
32 from the Whole genome Shotgun (WGS) sequences (Al-Nakheeb et al. 2017). Using this, full circular mt genome of

33 Panda, a sea weed, butterfly and fungal genomes were assembled with 99.5 % sequence similarity with reference  
34 sequences. Wang et al., (2018) used Newbler, Amos and Minimus software to assemble mt and chloroplast genomes  
35 of an ornamental plant *Salix suchowensis*, and a fruit tree, *Ziziphus jujuba*. In the above methods there is no need to  
36 separately isolate the organellar DNA of high quality. *Brassica oleracea* var. capitata mt genome assembly from  
37 WGS is found to be 219,975 bp in size with no large repeats (Yang et al.2018). Recently, mt genomes of *Sinapis*  
38 *arvensis* var. ‘Yeyou 18’, a cytoplasmic male sterile line (Nsa CMS) and its corresponding maintainer line  
39 ‘Zhongshuang 4’ were assembled using the mt sequences present in the total DNA (Sang et al. 2020). Present work  
40 deals with *Insilico* approaches to assemble and reconstitute the mt genome of banana species *Musa accuminata*  
41 using the WGS data in comparison with other model plants such as maize, rice, sugar cane, sugar beet and  
42 Arabidopsis.

43 The mt genome size of land plants range between 66 kb in *Viscum scurruloidem* to 11.3Mbp in *Silene*  
44 *conica* (Omelchenko et al. 2020). Among them the herbaceous monocots have a range of 400-500 kb (Cuenca et al.  
45 2013). Plant mt genomes evolve in a dramatic burst due to the presence of several repeats (Wynn and Christensen  
46 2019). The reasons for the larger mt genome size in plants and lesser number of assembled mt genomes compared to  
47 animals are also due to the rearrangements and recombinations caused by these repeats (Kovar et al. 2018).  
48 Comparison of mt genome sizes of a diploid ( $A_2$ ) and an allotetraploid ( $AD_2$ ) cotton species indicated only a slight  
49 variation in size and found to be 644 and 677 kb respectively (Chen et al. 2017). The cotton A, D and AD mt  
50 genomes differed drastically and had four or six large repeats leading to lot of inversions and translocations. Mt  
51 genomes of rice wide crosses and backcross inbred lines have shown radical change in the gene order and copy  
52 number (Yang et al. 2020). In Fabales, a different kind of genome expansion has occurred in mt genomes.  
53 Horizontal gene transfer events between intercellular and interspecific level have led to the genome size variation  
54 (Choi et al. 2019). Considerable amount of mt DNA in plants are horizontally transferred to either nuclear or  
55 chloroplast genome. DNA transfer events from mitochondria to nucleus are positively correlated to the size of  
56 nuclear genomes in several plants (Zang et al. 2020). Often, these horizontally transferred genes are not activated  
57 (Pinard et al.2019).

58 The mt gene content in plants do not vary much. Barley wild and cultivated varieties were found to have similar mt  
59 genome size and gene content with only three SNPs. These genomes contain 33 protein coding genes, three rRNA  
60 and 16 tRNAs (Hisano et al. 2016). Similarly, chiltepin pepper (*Capsicum annuum* var *glabriusculum*) has 31  
61 known protein coding genes, three rRNA genes and 25 tRNA genes (Magdy and Ouyong 2020). In *Raphanus*  
62 *sativus*, L. 40 protein coding genes, three rRNA genes and 23 tRNA genes were found in the mt genome (Peng and  
63 Gao 2020). Very recently, six mitogenomes of *Damnacanthus indicus* was sequenced and found to have 32 protein  
64 coding genes after several losses (Han et al. 2021). Plant organellar genes undergo post transcriptional modifications  
65 such as splicing and editing, among them RNA editing specifically C to U change is found to be evolved during  
66 early land plant development (Liu et al. 2011). Most of the editing sites create nonsynonymous changes leading to  
67 protein change however they lead to a conservative change to maintain the function (Omelchenko et al. 2020). RNA  
68 editing in protein coding genes is found to increase the protein function and codon bias. Higher frequency of editing

69 was observed immediately after exposure to salt stress in Barley mt nad3 gene (Ramadan 2020). However, in  
70 Arabidopsis reduced RNA editing rate is found in heat stressed plants and suggested to have a regulatory role in  
71 abiotic stress tolerance (Chu and Wei 2020). Differential RNA editing pattern was observed between Cytoplasmic  
72 Male Sterile (CMS) and Fertile plants in Pigeon Pea (Kaila et al. 2019). Nodulation process which fixes atmospheric  
73 Nitrogen is an energy demanding development involving higher mt activity. Higher splicing and RNA editing  
74 efficiency is seen in nodulating roots (Sun et al. 2020). Edera and Sanchez-Puerta (2021) has recently developed a  
75 computational frame work to identify editing sites in *Nicotiana tabacum* mt genome.

76 Assembly of AA mt genome will provide the genome size, number of respiratory and ribosomal proteins, tRNA and  
77 rRNA genes in it. Assembling the organellar genome from the whole genome sequence data can be possibly done de  
78 novo by using programs like Norgal (Al-Nakeeb et al. 2017) or by using reference sequence with CONTIGuator  
79 (Galardini et al.2015, Halim et al.2016). This information will be useful for researchers who are interested in  
80 analyzing characters which are controlled by nuclear and mitochondrial interaction (Hanson and Bentolila 2004). In  
81 Maize (Weiwei et al. 2017) and Arabidopsis (Lee et al. 2017) embryo, seed development is modulated by genes  
82 located in mt genome which is regulated by nuclear genes. Mitochondrial genes undergo post transcriptional  
83 modifications such as splicing and editing which are regulated tissue and stage specifically by nuclear genes  
84 (Hanson and Bentolila 2004). The knowledge on gene content, gene structure cis or trans spliced would enable a  
85 researcher to correlate a molecular factor to a phenotype. This study focuses on assembling the mt genome of  
86 banana for the above-mentioned applications. Besides, paternal vs maternal transmission (Faure et al.,1994) of mt  
87 genes to the hybrids can be ascertained if the full genome is known in completion.

## 88 **METHODOLOGY**

### 89 *Data collection*

90 The contigs using WGS of the *Musa acuminata* subsp. *malaccensis* was collected from NCBI GenBank  
91 CAJGYN000000000.1 (Bioproject: PRJEA82777) (D'Hont et al. 2012). Among the genomic sequences,12 mt  
92 fragments have been separated from the nuclear genome. The contigs were quality checked removed from the other  
93 contigs and stored in a separate file. These contigs were then subjected to nucleotide search using NCBI BLASTN  
94 using 5 different reference mt genomes of Maize (NC\_007982.1), rice (NC\_011033), Arabidopsis (NC\_037304.1),  
95 sugar-beet (NC\_002511.2) and sugarcane (NC\_031164.1).

### 96 *Sequence assembly and circularization*

97 The sequence comparison of the mt contigs of *Musa acuminata* subsp. *malaccensis* DH Pahang resulted in several  
98 fragments of sequence from each reference. The sequences obtained as a result of NCBI BLASTN are pooled  
99 together and assembled using CONTIGuator (Galardini et al.2015) (<http://contiguator.sourceforge.net/>) that resulted  
100 in a single scaffold. This program uses BLAST to align the draft sequence against the reference sequence and  
101 provides a single scaffold. CGView (Grant and Stothard 2008) (<http://cgview.ca/>) is a Circular Genome  
102 Visualization server was used to depict a circular genome of mitochondria. The scaffold sequence (1.2 Mb) as well  
103 as assembled sequence in single fasta format were analyzed through CG viewer. Gene labeling in the map was done

104 in the same tool. Individual track of protein coding genes, ORFs, tRNAs and rRNAs were created as separate text  
105 file and fed to the server for visualization. GC skew and GC content can be obtained from the server directly. The  
106 location of the genes whether in sense or antisense strand were also manually recorded while labeling. Legend and  
107 captions were also included in the figure through the software.

### 108 ***Repeats Identification***

109 Repeats in the assembled mitochondrial genome was identified using Tandem Repeat Finder which is a public  
110 repository tool to identify repeats present in genomic DNA. (<https://tandem.bu.edu/cgi-bin/trdb/trdb.exe>). The  
111 assembled mt genome in fasta file format was fed to the server to find repeats. Result was immediately obtained  
112 with coordinates, sequences and copy number. It can be downloaded in any formats for further analyses. The copy  
113 number and percentage of repeats were calculated using the obtained results.

### 114 ***Gene Annotation***

115 MFANNOT is a mt genome annotation (<https://megasun.bch.umontreal.ca/RNAweasel/>) (Beck and Lang 2010)  
116 server that utilizes various tools and programs to provide detailed annotation on the introns, exon sequences using  
117 comparative analysis. The input given is the scaffold sequence obtained from the CONTIGuator, as well as the  
118 merged fasta file and the parameters are set to default with standard mitochondrion annotation settings. Time taken  
119 for annotation depends on the size of the mt genome given as input, as the plant mt genomes are bigger in size, total  
120 time needed can be up to 1- 2 hours. The results are directly sent to the email entered to the server. Results consists  
121 of 3 files, one with the sequences translated, one with the annotations and other with the genes present. The GC  
122 content of the scaffold was calculated using GC calculator. The translated sequences are separated and stored for  
123 future use. Annotated information is manually recorded in MS excel sheet for easy handling of information. The  
124 results were also compared with another annotation tool MITOFY (<https://dogma.cccb.utexas.edu/mitofy/>).

### 125 ***Comparative Analyses and Editing site identification***

126 The annotated list of mt genes identified in *Musa accuminata subsp. malaccensis* DH-Pahang are compared against  
127 the available genomic data of other varieties, subspecies, species and genus by doing a BLASTP search. The results  
128 were analyzed for variation in gene content, split genes and length variation in nucleotide and protein sequences  
129 with reference to the *M. balbisiana* mt genes. Chloroplast DNA content in banana mt genome was analyzed by  
130 BLASTN search of both mt and chloroplast genomes of banana. Editing sites for all the mt genes of *M. accuminata*  
131 and *M. balbisiana* were identified using their DNA compared against their respective transcriptome data  
132 (SRX10460839; SRX767394) available in NCBI. Pairwise comparison of mt DNA and transcript sequences  
133 (cDNA) were carried using BLASTN program for all annotated genes. Variations corresponding to C in mt DNA  
134 and T in cDNA were considered as C to U edited sites.

## 135 **RESULTS**

### 136 ***Mitochondrial genome assembly***

137 As a result of banana mt sequences assembly using the CONTIGuator, with five model organisms as  
138 references, a single scaffold was obtained. The scaffold sequence was 409,574 bp in length with a GC content of  
139 45.3% (Table 1). The percentage coverage and identity obtained in comparison with related model organisms,  
140 Maize, rice, sugarcane, sugar beet and Arabidopsis are given in Fig 1. Annotation of this assembled genome by  
141 MFANNOT resulted in the identification 97 genes including ORFs (Table 1; Fig.2). There are 45 ORFs present in  
142 the genome which are 300bp and above reported by the program. The number of respiratory genes in banana mt  
143 genome is 25, ribosomal protein genes 15, tRNA genes 12 and rRNA gene one. The coding regions of the genome  
144 accounts to 22.8% of the total genome. There are 169 tandem repeats present in the banana mt genome  
145 (Supplementary Table1). The length of the repeats ranges from 15 bp to 1500 bp. These tandem repeats accounts to  
146 about 25.34% of the total mt genome size. The two copy repeats contribute to 21.22%. The three and four copy  
147 repeats contribute to 2.61% and 1.51% of the mt genome size respectively.

#### 148 ***Mitochondrial gene Analyses***

149 The location, copy number, presence and number of introns of these genes are listed in the Table2. The  
150 number of genes with known unique function excluding the additional copies is 41 (Table 2). Out of these 41 genes  
151 only three of them are single copy genes. Other genes have maximum of seven copies. The number of copies of  
152 tRNA is found to be even more and one of them have fourteen copies. (Supplementary table2). There are ten split  
153 genes present in the mt genome. These genes also contain groupII introns. Among them, atpB and ccmF are cis-  
154 spliced and the rest eight of them are trans-spliced genes. Among the cis-spliced genes, atpB has two introns, and  
155 ccmF is with single intron in four copies and one copy has two introns. Among the 233 genes including all copies  
156 present in the mt genome (Fig.2) 141 of them are present in sense strand and the rest in antisense strand. A  
157 comparative analyses of gene content with the four model organisms, maize, rice, Arabidopsis and sugarbeet are  
158 presented in Table3. Among the respiratory complex genes, ccmFC and ccmB genes are not present in banana with  
159 reference to the four model organisms. Ribosomal protein genes, rps1, rps7 and rpl2 are pseudogenes. Other  
160 category genes, matr, mttB are absent compared to the other organism whereas ftsH is a pseudogene in banana.  
161 There are seven pseudogenes identified in the annotation results which are all truncated in nature. However, there  
162 are few genes which are intact with unconventional start and stop codons (Table 2). The amino acid length and the  
163 percentage similarity of the mt proteins of other *M. accuminata* subspecies or varieties show 100% similarity except  
164 a few (supplementary Table2). The average percentage similarity shared between *M. accuminata* and *M. balbisiana*  
165 mt proteins is 98% (Table 2). There are four protein coding genes that are missing in *M. balbisiana* genome  
166 compared with *M.accuminata*.

#### 167 ***Mitochondrial RNA editing***

168 The mt RNA editing status was analyzed for all protein coding genes of *M. accuminata* and compared  
169 against the *M. balbisiana*. The number of editing sites, their position, change of amino acid if any and intron  
170 position are given in table 4. There is a drastic difference (41 vs 6) observed in the editing status between *M.*  
171 *balbisiana* and *M. accuminata* mt genomes. The graph (Fig. 3) represents the genes in which editing differences are  
172 found between *M. accuminata* and *M. balbisiana*. The bar length corresponds to the number of editing sites

173 observed. There were 18 genes which showed editing of mRNA in *M. balbisiana* species compared to only five  
174 genes in *M. accuminata*. Among them nad6 and rps1 are unique which were not edited in *M. balbisiana*. The other  
175 three genes, ccmC, rps12 and petB genes had just one editing site. The nad6 gene is the only gene that had two  
176 editing sites in *Accuminata* however one of them is a synonymous change (Table 4). Twenty seven percent of the  
177 editing observed in *M. balbisiana* are synonymous. atp 9 gene had the maximum of seven editing sites and a stop  
178 codon is created by editing. Introns are also found to be edited in nad4L and nad5 genes of *Balbisiana*.

## 179 **DISCUSSION**

### 180 **Banana mt genome assembly from Whole Genome Shotgun sequence**

181 The contigs of mt sequences of DH Pahang were assembled from the genomic shotgun sequences. This approach of  
182 extracting mt sequences from total genomic sequence was followed in several algal mt genome assembly.  
183 Mitochondrial genomes of diatoms *Phaeodaetylum tricornutum* and *Talassiosira pseudonana* were obtained by  
184 sequencing the total genome including plastid, mt and nuclear genomes (Secq and Green 2011). The shotgun  
185 sequences were assembled by JGI/JAZZ assembler. The mt genomes were assembled by sequence similarity to  
186 other algal mt genomes. Similarly, sequences of mt genomes of 10 algae were assembled from the genomic  
187 sequences downloaded either from genbank or related published data (Guillory et al. 2018). These algal mt sequences  
188 were selected based on GC content, size, BLASTN sequence similarity to other mt genomes. Falcon (Ver.4) was  
189 used to assemble the genome and circular mt topology was predicted. CONTIGuator tool was used to assemble the  
190 mt sequences listed in the DH Pahang CAJGYN000000000.1. This tool can address the sequence gaps and more  
191 than one circular molecule (Galardini et al. 2011). Besides, this can also align contigs from a draft genome by  
192 comparing it to several reference genomes based on their alignment and orientation (Galardini et al. 2015).

### 193 **Compact mt genome**

194 The mt genome size of banana is 409 kb. This is smaller than two other monocots, maize, 539 kb (Clifton et al.  
195 2004) and rice, 490 kb (Notsu et al. 2002) mt genomes. The smaller size implicates compactly arranged genes with  
196 lesser extent of repeated sequences. The gene number is found to be comparatively higher (97 vs 58) than maize mt  
197 genome. Similarly, when the number of tandem repeat sequences were analyzed most of them are two copies and  
198 the three and four copy number repeats contribute to only 4% of the genome (SupplementaryTable1). In sugar beet,  
199 the repeat sequence TR1, which contains an array of 32 bp repeat sequences was found to be repeated to a maximum  
200 of 13 times (Nishizawa et al. 2000). In solanaceous plants, a common origin of these short repeats was observed.  
201 However, only in members of the tribe Hyoscyameae it has expanded to eight copies (Gandhini et al. 2019). Melon  
202 mt genome which is 2740 kb has nearly 42% of repeat sequences (Rodrigues – Moreno et al. 2011). These repeat  
203 sequences beside contributing to the mt genome size, also involve in recombination events that can further increase  
204 the genome size. Sullivan et al. (2020) have performed comparative analysis on the repeat abundance and  
205 recombination frequency in plant mt genomes. They reported that the recombination dynamics was heterogenous  
206 among gymnosperms and short repeats of 200bp and below are actively involved in recombination in one third of  
207 plant species they analyzed. There is a possibility of at least one recombination event in banana mt genome also.

208 Nearly 40% of the genes are in the antisense strand and the rest in the sense strand, there are only three shifts in  
209 orientation in the full genome (Table2 and Fig 2.). Presence of promiscuous DNA from other compartments by  
210 horizontal transfer might also contribute to the size of the mt genomes in plants. In apple approximately 20% of the  
211 mt DNA is transferred from other compartments (Goremykin et al. 2012). In banana, just 5.3% of chloroplast DNA  
212 was found in the mt genome (Table 1). The above observations, small genome size, possibility of one or two  
213 recombination events, high gene copies and low chloroplast DNA content could be the reasons for the compact  
214 nature of the genome.

### 215 ***High gene copy number***

216 Most of the banana mitochondrial genes are found duplicated and the maximum copy number is six in many of these  
217 genes. This suggests genome duplication rather than gene duplication event. Segmental duplication of genes can be  
218 identified when looking at the gene order repeated (Fig.2). For example, *rps12-nad3-nad1* order is repeated in the  
219 banana mt genome. *M. accuminata* genome is a dihaploid with AA genome. The process of dihaploid development  
220 by tissue culture may have increased the copy number of genes in this banana mt genome. Furthermore, paternal  
221 transmission and the possibility of maintaining several subcircular forms of the intact mt genome may contribute to  
222 this high copy number (Nagata et al., 1999; Tsujimura et al. 2019). In yeast, a linear scale increase in copy number  
223 with ploidy number is observed in both genomes (De Chiara et al. 2020). Similarly, in Arabidopsis autopolyploids,  
224 nuclear mitochondrial coordination is observed in genome duplication followed by tuned gene expression patterns in  
225 mt genes (Coate et al. 2020). The copy number of tRNA genes are higher than the protein coding genes. Out of the  
226 12 tRNA genes five of them match to the chloroplast genes. Chloroplast tRNA genes are found functional in  
227 mitochondria of angiosperms (Richardson et al. 2013). In Magnolia six tRNA genes are transferred from plastid and  
228 they are functional (Dong et al. 2020). This suggests that some of the tRNA could have chloroplast origin in banana  
229 also. RNA mediated gene duplication events are found in several taxa of plants (Cuenca et al. 2012). They have  
230 observed existence of processed paralogues along with precursors of *nad1* genes. In the case of banana DH Pahang  
231 mt genome, DNA duplication is most likely as introns are retained in all copies. However, the possibility of  
232 precursor mRNA/cDNA insertion is also likely since additional introns are gained in *ccmF* gene. Intact nature of  
233 these additional copies of these genes in banana suggests that they are under functional constraint.

### 234 ***Gene content***

235 The total number of unique protein coding genes present in the banana mitochondrial genome is slightly  
236 higher than other model plants. The core protein coding genes observed in Angiosperms is 24 (reviewed by Zardoya  
237 2020). Mangnolia has the largest set of 64 unique mitochondrial genes among flowering plant (Dong et al. 2020).  
238 However, the largest mt (11.7 Mb) genome assembled to date is from a gymnosperm which has 77 unique genes  
239 (Putintseva et al. 2020). The total number of unique genes is 52 in banana which goes up to 233 when all copies are  
240 considered. Hence the genome is compact with very little intergenic space. The number of tRNA and rRNA genes  
241 are slightly lower than other mt genomes. The average number of tRNA genes found in mt genomes across  
242 angiosperms is 17-29 (Michaud et al. 2011). In banana, the copy number of tRNA genes is up to twelve. The  
243 number of pseudogenes is seven in banana mt genome; many of them could be remnant genes that might have been

244 recently transferred to nucleus (Subramanian et al. 2001). The *rpl2* gene is one example, which is a pseudogene in  
245 wheat, functional in rice whereas many other plants do not have a mitochondrial copy. In banana, also a truncated  
246 *rpl2* is present, the rest of the gene could not be matched, but the annotation result suggests both possibility of  
247 pseudogene and a trans-spliced gene. A complete analysis of these truncated pseudogenes in closely related  
248 organisms in both nuclear and mt compartment might provide evidence for the recent horizontal transfer events.  
249 Recently, O’conner and Li (2020) also have proposed ‘Mitochondrial Fostering’ theory in which mitochondria play  
250 an important role in arrival and development of orphan genes which are not present in any other plants. In banana,  
251 there are several genes with either or both start and stop codon missing or non-classical are present. The  
252 unconventional start and stop codons may not make the gene to pseudogene. In *Arabidopsis ccmF* (N2) gene is  
253 functional despite the absence of classical start codon (Rayapuram et al. 2008). The *tatC* is a membrane transport  
254 protein which is present other than respiratory complex and ribosomal proteins in banana. This is also found in few  
255 other species including moss *Lycopodium cernuum* (Kanagara et al. 2021).

### 256 ***Banana A and B mitochondrial genome comparison***

257 Comparative analyses of *M. acuminata* sub sp *malacensis* DH-Pahang mt proteins with other AA genome mt  
258 proteins show 100 percentage similarity (Supplementary Table 3). In some multicopy genes, one copy of these  
259 genes shares a slightly lesser similarity however that is higher than the similarity percentage found between the two  
260 species *M. Accuminata* and *M. balbisiana*. The average sequence similarity between these two *Musa* species is  
261 98%. Barley and wheat mitochondrial respiratory proteins were almost similar with only few differences in few  
262 genes (Hisano et al. 2016). In cotton allopolyploids, among A and D genomes, A is found to be the donor of  
263 mitochondrial genomes of the progenitors (Chen et al. 2017). In banana also A and B genomes are available,  
264 comparing B mitochondrial genome and autopolyploid progenitors would resolve the origin of banana mt genome.  
265 In fishes, the mitochondrial gene similarity between allopolyploids were found to be higher when transmitted  
266 maternally than paternal transmission (You et al. 2014). The paternal/biparental transmission of mitochondrial DNA  
267 is documented in banana (Nagata et al.1999). When the editing sites were compared between two *Musa* genomes,  
268 *Balbisiana* is having a drastic high number. However, the editing sites were not leading to conservative changes in B  
269 genome. Similarly, A genome editing sites were different to that of B genome editing event. The A and B genome  
270 sequences used for comparison are from wild genotypes that are under natural selection. Hence, they may be  
271 evolving independently.

### 272 **Data availability**

273 The data underlying this article are available in NCBI (National Center for Biotechnology Information) and can be  
274 accessed with accession numbers -CAJGYN000000000.1- *Musa acuminata* subsp. *malaccensis*, NC\_007982.1-  
275 Maize, NC\_011033- rice, NC\_037304.1- *Arabidopsis*, NC\_002511.2- sugar-beet and NC\_031164.1- sugarcane. The  
276 assembled AA genome data will be submitted to NCBI after annotation.

### 277 **Acknowledgement:**



278 We thank all the authors and fellows who supported this idea and their encouragement towards completing this  
279 article.

280 **Funding:** This study was initiated as part of a “North East Banana Consortium funded project, by Department of  
281 Biotechnology, Government of India. It is a full in silico work, only the second Authors salary was from the fund.

282 **Conflicts of interest/Competing interests:** No conflicting interest

### 283 Literature cited

- 284 1. Al-Nakeeb K, Petersen TN, Sicheritz-Pontén T (2017) Norgal: extraction and de novo assembly of  
285 mitochondrial DNA from whole-genome sequencing data. *BMC bioinform* 18(1):1-7  
286 <https://doi.org/10.1186/s12859-017-1927-y>
- 287 2. Beck N, Lang B (2010) MFannot, organelle genome annotation webserver.  
288 <http://megasun.bch.umontreal.ca/cgi-bin/mfannot/mfannotInterface.pl>
- 289 3. Chen Z, Nie H, Grover CE, Wang Y, Li P, Wang M, Pei H, Zhao Y, Li S, Wendel JF, Hua J (2017) Entire  
290 nucleotide sequences of *Gossypium raimondii* and *G. arboreum* mitochondrial genomes revealed A-  
291 genome species as cytoplasmic donor of the allotetraploid species. *Plant Biology* 19(3):484-493  
292 <https://doi.org/10.1111/plb.12536>
- 293 4. Chen Z, Nie H, Wang Y, Pei H, Li S, Zhang L, Hua J (2017) Rapid evolutionary divergence of diploid and  
294 allotetraploid *Gossypium* mitochondrial genomes. *BMC genomics* 18(1):1-15  
295 <https://doi.org/10.1186/s12864-017-4282-5>
- 296 5. Choi IS, Schwarz EN, Ruhlman TA, Khiyami MA, Sabir JS, Hajarrah NH, Sabir MJ, Rabah SO, Jansen RK  
297 (2019) Fluctuations in Fabaceae mitochondrial genome size and content are both ancient and recent. *BMC*  
298 *plant biology* 19(1): 1-15 <https://doi.org/10.1186/s12870-019-2064-8>
- 299 6. Chu D, Wei L (2020) Reduced C-to-U RNA editing rates might play a regulatory role in stress response of  
300 *Arabidopsis*. *J of plant physiol* 244:153081 <https://doi.org/10.1016/j.jplph.2019.153081>
- 301 7. Ck N, Lang B (2010) MFannot, organelle genome annotation webserver.  
302 <http://megasun.bch.umontreal.ca/cgi-bin/mfannot/mfannotInterface.pl>
- 303 8. Clifton SW, Minx P, Fauron CMR, Gibson M, Allen JO, Sun H, Thompson M, Barbazuk WB, Kanuganti  
304 S, Tayloe C, Meyer L (2004) Sequence and comparative analysis of the maize NB mitochondrial  
305 genome. *Plant physiology* 136(3):3486-3503 <https://doi.org/10.1104/pp.104.044602>
- 306 9. Coate JE, Schreyer WM, Kum D, Doyle JJ (2020) Robust cytonuclear coordination of transcription in  
307 nascent *Arabidopsis thaliana* autopolyploids. *Genes* 11(2):134 <https://doi.org/10.3390/genes11020134>
- 308 10. Cuenca A, Petersen G, Seberg O, Jahren AH (2012) Genes and processed paralogs co-exist in plant  
309 mitochondria. *J of mol evol* 74(3):158-169 <https://doi.org/10.1007/s00239-012-9496-1>
- 310 11. D’hont A, Denoeud F, Aury JM, Baurens FC, Carreel F, Garsmeur O, Noel B, Bocs S, Droc G, Rouard M,  
311 Da Silva C (2012) The banana (*Musa acuminata*) genome and the evolution of monocotyledonous plants.  
312 *Nature* 488(7410):213-217 <https://doi.org/10.1038/nature11241>

- 313 12. De Chiara M, Barré B, Persson K, Chioma AO, Irizar A, Schacherer J, Warringer J, Liti G (2020)  
314 Domestication reprogrammed the budding yeast life cycle. bioRxiv  
315 <https://doi.org/10.1101/2020.02.08.939314>
- 316 13. Dierckxsens N, Mardulyn P, Smits G (2017) NOVOPlasty: de novo assembly of organelle genomes from  
317 whole genome data. *Nucleic acids res* 45(4): e18-e18. <https://doi.org/10.1093/nar/gkw955>.
- 318 14. Dong S, Chen L, Liu Y, Wang Y, Zhang S, Yang L, Lang X, Zhang,S (2020) The draft mitochondrial  
319 genome of *Magnolia biondii* and mitochondrial phylogenomics of angiosperms. *PloS one* 15(4):0231020  
320 <https://doi.org/10.1371/journal.pone.0231020>
- 321 15. Fauré S, Noyer JL, Carreel F, Horry JP, Bakry F, Lanaud C (1994) Maternal inheritance of chloroplast  
322 genome and paternal inheritance of mitochondrial genome in bananas (*Musa acuminata*). *Current*  
323 *Genetics* 25(3): 265-269 <https://doi.org/10.1007/BF00357172>
- 324 16. Galardini M, Biondi EG, Bazzicalupo M and Mengoni A (2011) CONTIGuator: a bacterial genomes  
325 finishing tool for structural insights on draft genomes. *Source code for biology and medicine* 6 (1) :1-5  
326 <https://doi.org/10.1186/1751-0473-6-11>
- 327 17. Galardini, M, Mengoni A and Bazzicalupo M (2015) Mapping contigs using CONTIGuator. In *Bacterial*  
328 *Pangenomics* 163-176 Humana Press, New York, NY [https://doi.org/10.1007/978-1-4939-1720-4\\_11](https://doi.org/10.1007/978-1-4939-1720-4_11)
- 329
- 330 18. Gandini CL, Garcia LE, Abbona CC, Sanchez-Puerta MV (2019) The complete organelle genomes of  
331 *Physochlaina orientalis*: Insights into short sequence repeats across seed plant mitochondrial genomes. *Mol*  
332 *phylogenetics and evol* 137:274-284 <https://doi.org/10.1016/j.ympev.2019.05.012>
- 333 19. Garcia LE, Edera A, Palmer JD, Sato H, Sanchez-Puerta MV (2021) Horizontal gene transfers dominate the  
334 functional mitochondrial gene space of a holoparasitic plant. *New Phytologist* 229(3): 1701-1714  
335 <https://doi.org/10.1111/nph.16926>.
- 336 20. Goremykin VV, Lockhart PJ, Viola R, Velasco R (2012) The mitochondrial genome of *Malus domestica*  
337 and the import-driven hypothesis of mitochondrial genome expansion in seed plants. *The Plant J* 71(4)  
338 :615-626 <https://doi.org/10.1111/j.1365-313X.2012.05014.x>
- 339 21. Grant JR, Stothard P (2008) The CGView Server: a comparative genomics tool for circular genomes.  
340 *Nucleic acids res* 36(suppl\_2): W181-W184 <https://doi.org/10.1093/nar/gkn179>
- 341 22. Guillory WX, Onyshchenko A, Ruck EC, Parks M, Nakov T, Wickett NJ and Alverson AJ (2018)  
342 Recurrent loss, horizontal transfer, and the obscure origins of mitochondrial introns in diatoms  
343 (*Bacillariophyta*). *Genome biology and evolution*, 10(6):1504-1515 <https://doi.org/10.1093/gbe/evy103>
- 344 23. Halim, MA, Rahman AY, Sim KS, Yam HC, Rahim AA, Ghazali AHA and Najimudin N (2016) Genome  
345 sequence of a Gram-positive diazotroph, *Paenibacillus durus* type strain ATCC 35681. *Genome*  
346 *announcements* 4(1): e00005-16. <https://doi.org/10.1128/genomeA.00005-16>
- 347 24. Han EK, Cho WB, Tamaki I, Choi IS, Lee JH (2021) Comparative Mitogenomic Analysis Reveals Gene  
348 and Intron Dynamics in Rubiaceae and Intra-Specific Diversification in *Damnacanthus indicus*. *Int j of mol*  
349 *sciences* 22(13): 7237 <https://doi.org/10.3390/ijms22137237>

- 350 25. Hanson MR, Bentolila S (2004) Interactions of mitochondrial and nuclear genes that affect male  
351 gametophyte development. *The Plant Cell*, 16(suppl\_1): S154-S169 <https://doi.org/10.1105/tpc.015966>
- 352 26. Hisano H, Tsujimura M, Yoshida H, Terachi T, Sato K (2016) Mitochondrial genome sequences from wild  
353 and cultivated barley (*Hordeum vulgare*). *BMC genomics* 17(1): 1-12 <https://doi.org/10.1186/s12864-016-3159-3>
- 354  
355 27. Kaila T, Saxena S, Ramakrishna G, Tyagi A, Tribhuvan KU, Srivastava H, Chaudhury A, Singh NK,  
356 Gaikwad K (2019) Comparative RNA editing profile of mitochondrial transcripts in cytoplasmic male  
357 sterile and fertile pigeonpea reveal significant changes at the protein level. *Mol biology rep* 46(2): 2067-  
358 2084 <https://doi.org/10.1007/s11033-019-04657-2>
- 359 28. Kanagara k, kanzariya r, bhatt p, monpara j, chudasama k, thaker v (2021) Mitochondrial genome  
360 characterization of lycopodium cernuum l. *J of Cell and Tissue Res* 21(1):7069-7076
- 361 29. Kovar L, Nageswara-Rao M, Ortega-Rodriguez S, Dugas DV, Straub S, Cronn R, Strickler SR, Hughes  
362 CE, Hanley KA, Rodriguez DN, Langhorst BW (2018) PacBio-based mitochondrial genome assembly of  
363 *Leucaena trichandra* (Leguminosae) and an intrageneric assessment of mitochondrial RNA editing.  
364 *Genome biology and evol* 10(9):2501-2517 <https://doi.org/10.1093/gbe/evy179>
- 365 30. Lee K, Han JH, Park YI, Colas des Francs-Small C, Small I, Kang H (2017) The mitochondrial  
366 pentatricopeptide repeat protein PPR 19 is involved in the stabilization of NADH dehydrogenase 1  
367 transcripts and is crucial for mitochondrial function and *Arabidopsis thaliana* development. *New*  
368 *Phytologist* 215(1):202-216 <https://doi.org/10.1111/nph.14528>
- 369 31. Liu Y, Xue JY, Wang B, Li L, Qiu YL (2011) The mitochondrial genomes of the early land plants *Treubia*  
370 *lacunosa* and *Anomodon rugelii*: dynamic and conservative evolution. *PLoS One* 6(10):25836  
371 <https://doi.org/10.1371/journal.pone.0025836>
- 372 32. Magdy M, Ouyang B (2020) The complete mitochondrial genome of the chiltepin pepper (*Capsicum*  
373 *annuum* var. *glabriusculum*), the wild progenitor of *Capsicum annum* L. *Mitochondrial DNA Part*  
374 *B* 5(1):683-684. <https://doi.org/10.1080/23802359.2020.1714496>.
- 375 33. Martínez-Cuenca MR, Iglesias DJ, Talón M, Abadía J, López-Millán AF, Primo-Millo E, Legaz F (2013)  
376 Metabolic responses to iron deficiency in roots of Carrizo citrange [*Citrus sinensis* (L.) Osbeck.× *Poncirus*  
377 *trifoliata* (L.) Raf. *Tree physiol* 33(3):320-329 <https://doi.org/10.1093/treephys/tpt011>
- 378 34. Michaud M, Cognat V, Duchêne AM, Maréchal-Drouard L (2011) A global picture of tRNA genes in plant  
379 genomes. *The Plant J* 66(1):80-93 <https://doi.org/10.1111/j.1365-313X.2011.04490.x>
- 380 35. Nagata N, Saito C, Sakai A, Kuroiwa H, Kuroiwa T (1999) The selective increase or decrease of organellar  
381 DNA in generative cells just after pollen mitosis one controls cytoplasmic inheritance. *Planta* 209(1):53-65  
382 <https://doi.org/10.1007/s004250050606>
- 383 36. Nishizawa S, Kubo T, Mikami T (2000) Variable number of tandem repeat loci in the mitochondrial  
384 genomes of beets. *Curr Genetics* 37(1):34-38 <https://doi.org/10.1007/s002940050005>
- 385 37. Notsu Y, Masood S, Nishikawa T, Kubo N, Akiduki G, Nakazono M, Hirai A, Kadowaki K (2002) The  
386 complete sequence of the rice (*Oryza sativa* L.) mitochondrial genome: frequent DNA sequence acquisition

- 387 and loss during the evolution of flowering plants. *Mol Genetics and Genom* 268(4):434-445  
388 <https://doi.org/10.1007/s00438-002-0767-1>
- 389 38. O’Conner S, Li, L (2020) Mitochondrial fostering: the mitochondrial genome may play a role in plant  
390 orphan gene evolution. *Front in plant science* 11:1855 <https://doi.org/10.3389/fpls.2020.600117>
- 391 39. Omelchenko DO, Makarenko MS, Kasianov AS, Schelkunov MI, Logacheva MD, Penin AA (2020)  
392 Assembly and Analysis of the Complete Mitochondrial Genome of *Capsella bursa-pastoris*. *Plants*  
393 9(4):469. <https://doi.org/10.3390/plants9040469>
- 394 40. Oudot-Le Secq MP and Green BR. (2011) Complex repeat structures and novel features in the  
395 mitochondrial genomes of the diatoms *Phaeodactylum tricornutum* and *Thalassiosira pseudonana*. *Gene*  
396 476(1-2):20-26 <https://doi.org/10.1016/j.gene.2011.02.001>
- 397 41. Peng H, Gao J (2020) The whole genome assembly and evolution analyze of carmine radish (*Raphanus*  
398 *sativus* L.) Mitochondrion. *Mitochondrial DNA Part B* 5(3):2252-2253  
399 <https://doi.org/10.1080/23802359.2020.1772136>
- 400 42. Pinard D, Myburg AA, Mizrachi E (2019) The plastid and mitochondrial genomes of *Eucalyptus grandis*.  
401 *BMC genomics* 20(1):1-14 <https://doi.org/10.1186/s12864-019-5444-4>
- 402 43. Putintseva YA, Bondar EI, Simonov EP, Sharov VV, Oreshkova NV, Kuzmin DA, Konstantinov YM,  
403 Shmakov VN, Belkov VI, Sadovsky MG, Keech O (2020) Siberian larch (*Larix sibirica* Ledeb.)  
404 mitochondrial genome assembled using both short and long nucleotide sequence reads is currently the  
405 largest known mitogenome. *BMC genomics* 21(1):1-12 <https://doi.org/10.1186/s12864-020-07061-4>
- 406 44. Ramadan AM (2020) Salinity effects on nad3 gene RNA editing of wild barley mitochondria. *Mol biology*  
407 *rep* 47(5): 3857-3865 <https://doi.org/10.1007/s11033-020-05475-7>
- 408 45. Rayapuram N, Hagenmulle J, Grienberger JM, Bonnard G, Giegé P (2008) The three mitochondrial  
409 encoded CcmF proteins form a complex that interacts with CCMH and c-type apocytochromes in  
410 *Arabidopsis*. *J of Biol Chemistry* 283(37):25200-25208 <https://doi.org/10.1074/jbc.M802621200>
- 411 46. Richardson AO, Rice DW, Young GJ, Alverson AJ, Palmer JD (2013) The “fossilized” mitochondrial  
412 genome of *Liriodendron tulipifera*: ancestral gene content and order, ancestral editing sites, and  
413 extraordinarily low mutation rate. *BMC biology* 11(1):1-17 <https://doi.org/10.1186/1741-7007-11-29>
- 414 47. Rodríguez-Moreno L, González VM, Benjak A, Martí MC, Puigdomènech P, Aranda MA, Garcia-Mas J  
415 (2011) Determination of the melon chloroplast and mitochondrial genome sequences reveals that the largest  
416 reported mitochondrial genome in plants contains a significant amount of DNA having a nuclear  
417 origin. *BMC genomics* 12(1):1-14 <https://doi.org/10.1186/1471-2164-12-424>
- 418 48. Sang S, Mei D, Zaman QU, Liu J, Cheng H, Fu L, Wang W, Wang H, Hu Q (2020) An efficient approach  
419 for obtaining plant organelle genomes. *Oil Crop Science* 5(3):129-135  
420 <https://doi.org/10.1016/j.ocsci.2020.07.003>
- 421 49. Subramanian S, Fallahi M, Bonen L (2001) Truncated and dispersed rpl2 and rps19 pseudogenes are co-  
422 transcribed with neighbouring downstream genes in wheat mitochondria. *Curr genetics* 39(4):264-272  
423 <https://doi.org/10.1007/s002940100204>

- 424 50. Sullivan AR, Eldfjell Y, Schiffthaler B, Delhomme N, Asp T, Hebelstrup KH, Keech O, Öberg L, Møller  
425 IM, Arvestad L, Street NR (2020) The mitogenome of Norway spruce and a reappraisal of mitochondrial  
426 recombination in plants. *Genome biology and evol* 12(1):3586-3598 <https://doi.org/10.1093/gbe/evz263>
- 427 51. Sun Y, Xie M, Xu Z, Chan KC, Zhong JY, Fan K, Wong-Bajracharya J, Lam HM, Lim BL (2020)  
428 Differential RNA Editing and Intron Splicing in Soybean Mitochondria during Nodulation. *Int j of mol*  
429 *sciences* 21(24): 9378 <https://doi.org/10.3390/ijms21249378>
- 430 52. Tsujimura M, Kaneko T, Sakamoto T, Kimura S, Shigyo M, Yamagishi H, Terachi T (2019)  
431 Multichromosomal structure of the onion mitochondrial genome and a transcript  
432 analysis. *Mitochondrion* 46:179-186 <https://doi.org/10.1016/j.mito.2018.05.001>
- 433 53. Wang X, Cheng F, Rohlsen D, Bi C, Wang C, Xu Y, Wei S, Ye Q, Yin T, Ye N (2018) Organellar genome  
434 assembly methods and comparative analysis of horticultural plants. *Horticulture research* 5(1):1-13  
435 <https://doi.org/10.1038/s41438-017-0002-1>
- 436 54. Wang Z, Miao H, Liu J, Xu B, Yao X, Xu C, Zhao S, Fang X, Jia C, Wang J, Zhang J (2019) *Musa*  
437 *balbisiana* genome reveals subgenome evolution and functional divergence. *Nature plants* 5(8):810-821  
438 <https://doi.org/10.1038/s41477-019-0452-6>
- 439 55. Weiwei Qi, Zhongrui Tian, Lei Lu, Xiuzu Chen, Xinze Chen, Wei Zhang, Rentao Song (2017) Editing of  
440 Mitochondrial Transcripts nad3 and cox2 by Dek10 Is Essential for Mitochondrial Function and Maize  
441 Plant Development, *Genetics* 205(4):1489–1501 <https://doi.org/10.1534/genetics.116.199331>
- 442 56. Wynn EL, Christensen AC (2019) Repeats of unusual size in plant mitochondrial genomes: identification,  
443 incidence and evolution. *G3: Genes, Genomes, Genetics* 9(2):549-559  
444 <https://doi.org/10.1534/g3.118.200948>
- 445 57. Yang K, Nath UK, Biswas MK, Kayum MA, Yi GE, Lee J, Yang TJ, Nou IS (2018) Whole-genome  
446 sequencing of *Brassica oleracea* var. *capitata* reveals new diversity of the mitogenome. *PloS one*  
447 13(3):0194356 <https://doi.org/10.1371/journal.pone.0194356>
- 448 58. Yang W, Zou J, Wang J, Li N, Luo X, Jiang X, Li S (2020) Wide crossing diversify mitogenomes of rice.  
449 *BMC plant biology* 20(1):1-12 <https://doi.org/10.1186/s12870-020-02380-w>
- 450 59. Yu, Jeong-Nam, Soonok Kim, Myounghai Kwak (2014) Complete mitochondrial genome sequence of a  
451 Korean *Pungtungia herzi* (Cypriniformes, Gobioninae). *The J of DNA Mapp Sequencing and Analysis* 25  
452 96):414-415 <https://doi.org/10.3109/19401736.2013.809435>
- 453 60. Zardoya R (2020) Recent advances in understanding mitochondrial genome diversity. *F1000Research* 9  
454 <https://doi.org/10.12688/f1000research.21490.1>
- 455 61. Zhang GJ, Dong R, Lan LN, Li SF, Gao WJ, Niu HX (2020) Nuclear integrants of organellar DNA  
456 contribute to genome structure and evolution in plants. *Int J of mol sciences* 21(3):707  
457 <https://doi.org/10.3390/ijms21030707>

458

459 Fig 1: Graph showing query coverage of *M.accuminata* mitochondrial genome with Rice, Maize,  
460 Sugarcane, Arabidopsis and Beet mitochondrial genomes

461 Fig 2: Circular view of assembled *M.accuminata* subsp. *malaccensis* DH Pahang with individual tracks  
462 which depicts respiratory complex, open reading frame, tRNA and rRNA genes, along with GC skew and  
463 GC content

464 Fig 3: Bar graph showing number of C to U editing sites identified in mitochondrial transcripts between  
465 *M.accuminata* (blue) and *M.balbisiana* (orange). Length of the bar represents the number of editing sites  
466 in respective genes

Fig 1

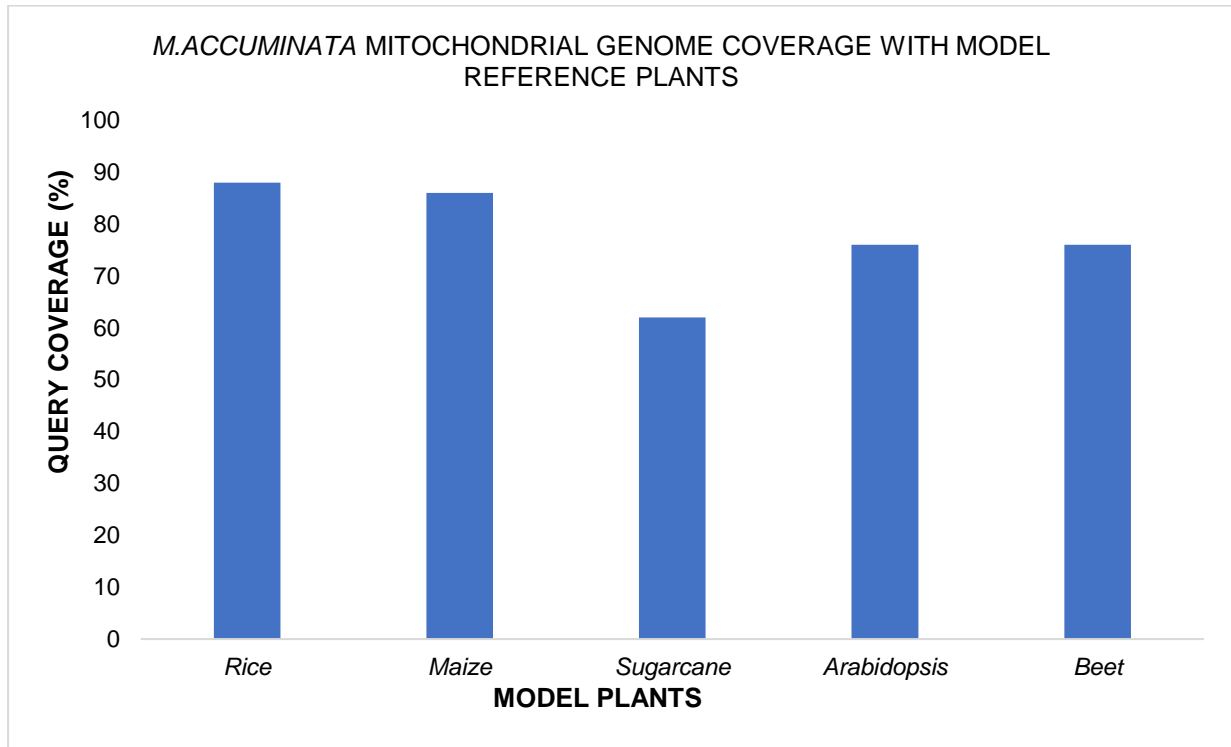

Fig 2

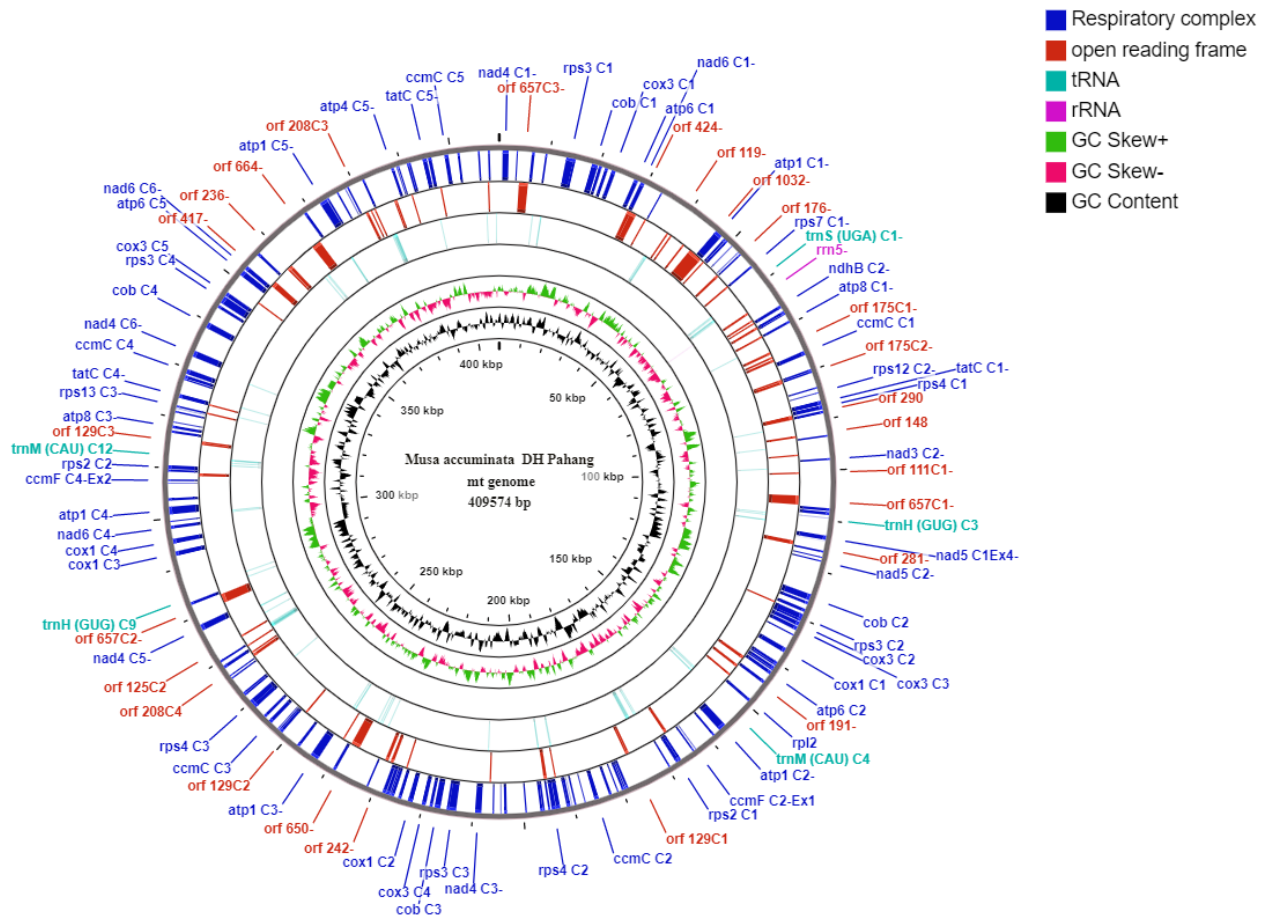



Fig 3

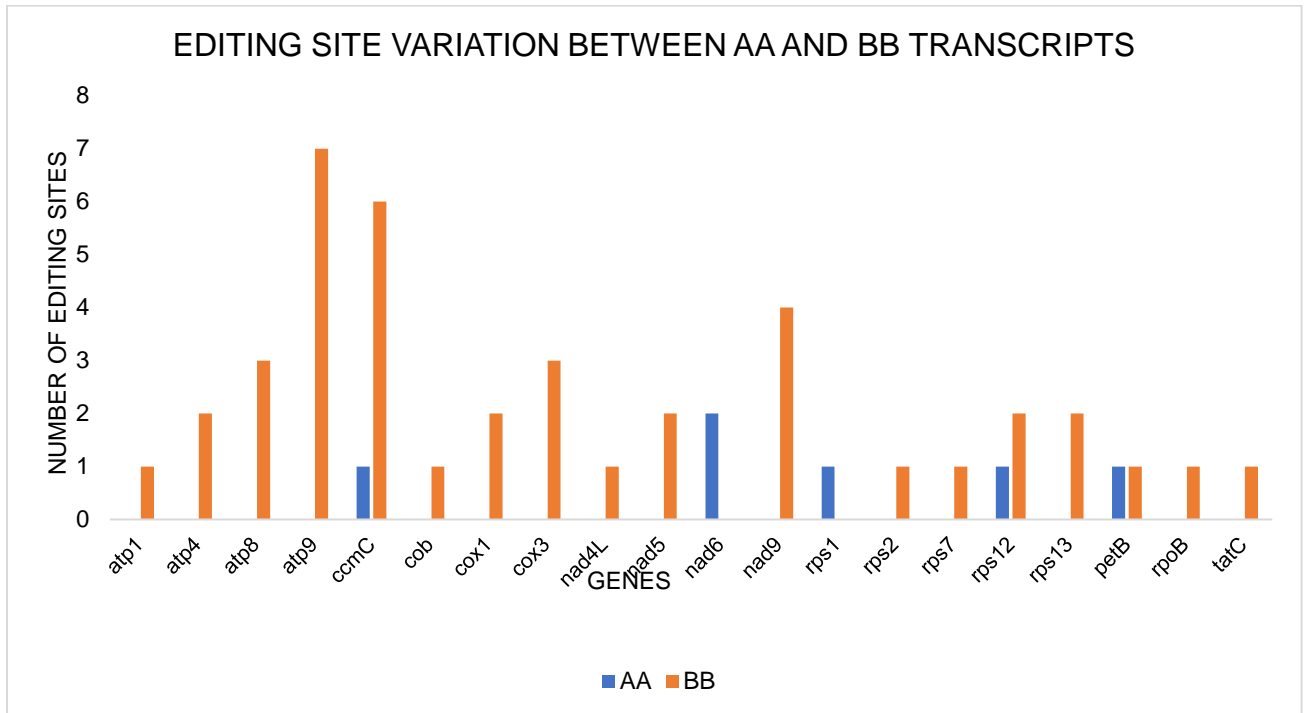

Table 1: General characters of the assembled *M. accuminata* mitochondrial genome

| Features            | Content   |
|---------------------|-----------|
| Genome size         | 409754 bp |
| GC content          | 45.3%     |
| Chloroplast content | 5.3%      |
| Tandem repeats      | 25.34%    |
| Respiratory complex | 22        |
| Ribosomal protein   | 10        |
| Other protein       | 1         |
| Pseudo genes        | 7         |
| tRNAs               | 12        |
| rRNA                | 2         |
| ORF                 | 43        |
| Total no of genes   | 97        |

Table 2: List of mitochondrial genes annotated in *M.accuminata* DH Pahang subspecies malaccensis and their comparison with *M.balbisiana*

|           | GENE                         | FUNCTION DESCRIPTION          | COPY NUMBER    | START REGION                 | STOP REGION | INTRON | S/A                                                        | LENGTH OF AMINO ACID | PERCENTAGE IDENTITY WITH <i>M. Balbisiana</i> |             |       |
|-----------|------------------------------|-------------------------------|----------------|------------------------------|-------------|--------|------------------------------------------------------------|----------------------|-----------------------------------------------|-------------|-------|
| Complex I | nad1                         | NADH dehydrogenase subunit 1  | 1              |                              | 83721       | 83425  | 83424-3705                                                 | A                    | 182                                           | 100         |       |
|           |                              |                               |                |                              | 3704        | 3453   |                                                            |                      | 190283-189807                                 | 139         | 97.85 |
|           |                              |                               | 2 <sup>a</sup> | Ex-2                         | 190364      | 190284 | 190283-189807                                              |                      |                                               | A           | 99    |
|           |                              |                               |                | Ex-1                         | 189806      | 189468 |                                                            |                      |                                               |             |       |
|           |                              |                               | 3 <sup>b</sup> |                              | 199621      | 199325 | 327587-321855, 321773-321297                               |                      | A                                             | 238         | 99.48 |
|           |                              |                               | 4              | Ex-3                         | 327884      | 327588 |                                                            |                      |                                               |             |       |
|           |                              |                               |                | Ex-2                         | 321854      | 321774 |                                                            |                      |                                               |             |       |
|           |                              |                               | 4              | Ex-1                         | 321296      | 320958 | 327587-321855, 321773-321297                               |                      | A                                             | 238         | 99.48 |
|           |                              |                               |                | 1                            |             | 21211  |                                                            |                      |                                               |             |       |
|           |                              |                               | nad2           | NADH dehydrogenase subunit 2 | 2           |        | 50853                                                      |                      | 50701                                         | 50700-49080 | A     |
|           | Ex-1                         | 49079                         |                |                              | 48612       |        |                                                            |                      |                                               |             |       |
|           | nad3                         | NADH dehydrogenase subunit 3  | 1              |                              | 80485       | 80129  |                                                            | A                    | 118                                           | 97.46       |       |
|           |                              |                               | 2              |                              | 98031       | 97666  |                                                            |                      | 121                                           |             |       |
|           |                              |                               | 3 <sup>b</sup> |                              | 196654      | 196199 |                                                            |                      | 151                                           | 96.61       |       |
|           |                              |                               | 4 <sup>b</sup> |                              | 262385      | 262029 |                                                            |                      | 118                                           | 97.03       |       |
|           |                              |                               | 5 <sup>b</sup> |                              | 391885      | 391529 |                                                            |                      | 118                                           | 100         |       |
|           |                              |                               | 6              |                              | 407705      | 407340 |                                                            |                      | 121                                           |             |       |
|           | nad4                         | NADH dehydrogenase subunit 4  | 1 <sup>a</sup> |                              | 1865        | 642    |                                                            | A                    | 407                                           | 99.49       |       |
|           |                              |                               | 2              |                              | 182740      | 182213 |                                                            |                      | 175                                           | 97.39       |       |
|           |                              |                               | 3 <sup>c</sup> |                              | 209572      | 208349 |                                                            |                      | 407                                           | 99.49       |       |
|           |                              |                               | 4              |                              | 256304      | 255777 |                                                            |                      | 175                                           | 97.39       |       |
|           |                              |                               | 5 <sup>a</sup> |                              | 278161      | 276938 |                                                            |                      | 407                                           | 99.49       |       |
|           |                              |                               | 6 <sup>a</sup> |                              | 333740      | 332517 |                                                            |                      | 407                                           | 99.5        |       |
|           |                              |                               | 7              |                              | 401734      | 401294 |                                                            |                      | 146                                           | 97.69       |       |
|           | nad4L                        | NADH dehydrogenase subunit 4L | 1              |                              | 67863       | 67591  |                                                            | A                    | 90                                            | 98.89       |       |
|           |                              |                               | 2              |                              | 179515      | 179243 |                                                            |                      | 90                                            | 97.5        |       |
|           |                              |                               | 3              |                              | 252249      | 251977 |                                                            |                      | 90                                            | 98.8        |       |
| 4         |                              |                               | 389546         | 389274                       | 90          | 98.86  |                                                            |                      |                                               |             |       |
| nad5      | NADH dehydrogenase subunit 5 | 1                             |                | Ex-5                         | 117453      | 117223 | 117222-116379, 116003-114085, 114061-113809, 112982-109546 | A                    | 506                                           | 97.97       |       |
|           |                              |                               |                | Ex-4                         | 116378      | 116004 |                                                            |                      |                                               |             |       |
|           |                              |                               |                | Ex-3                         | 114084      | 114062 |                                                            |                      |                                               |             |       |
|           |                              |                               |                | Ex-2                         | 113808      | 112983 |                                                            |                      |                                               |             |       |
|           |                              |                               |                | Ex-1                         | 109545      | 109480 |                                                            |                      |                                               |             |       |
|           |                              | 2                             |                | 118226                       | 117960      | 88     | 96.2                                                       |                      |                                               |             |       |
| nad6      | NADH dehydrogenase subunit 6 | 1                             |                | 29584                        | 28793       |        | A                                                          | 263                  | 99.48                                         |             |       |
|           |                              | 2                             |                | 144886                       | 144263      |        |                                                            | 207                  | 99.49                                         |             |       |
|           |                              | 3                             |                | 225041                       | 224391      |        |                                                            | 216                  | 99.5                                          |             |       |
|           |                              | 4                             |                | 298572                       | 297940      |        |                                                            | 210                  | 99.5                                          |             |       |
|           |                              | 5                             |                | 299518                       | 299291      |        |                                                            | 75                   | 98.31                                         |             |       |
|           |                              | 6                             |                | 353359                       | 352547      |        |                                                            | 270                  | 99.5                                          |             |       |

|             |      |                                |                |                            |                  |   |               |       |
|-------------|------|--------------------------------|----------------|----------------------------|------------------|---|---------------|-------|
|             | nad7 | NADH dehydrogenase subunit 7   | 1              | 181036                     | 180773           | A | 87            |       |
|             |      |                                | 2              | 252574                     | 252386           |   | 62            |       |
|             |      |                                | 3              | 319150                     | 318962           |   | 62            |       |
|             |      |                                | 4              | 389157                     | 388969           |   | 62            |       |
|             | nad9 | NADH dehydrogenase subunit 9   | 1              | 6445                       | 7017             | S | 190           | 100   |
|             |      |                                | 2              | 107541                     | 108113           |   | 190           | 100   |
|             |      |                                | 3              | 108295                     | 108867           |   | 190           | 100   |
|             |      |                                | 4              | 238525                     | 239097           |   | 190           | 100   |
|             |      |                                | 5              | 282403                     | 282975           |   | 190           | 100   |
|             |      |                                | 6 <sup>a</sup> | 368548                     | 369132           |   | 194           | 100   |
| Complex III | cob  | apocytochrome b                | 1              | 18542                      | 19729            | S | 395           | 96.92 |
|             |      |                                | 2              | 124906                     | 126168           |   | 420           | 97.58 |
|             |      |                                | 3              | 216483                     | 217655           |   | 390           | 97.3  |
|             |      |                                | 4              | 338767                     | 339939           |   | 390           | 97.3  |
|             | petB | cytochrome b6                  | 1              | 169455                     | 169787           | S | 110           |       |
| Complex IV  | cox1 | cytochrome c oxidase subunit 1 | 1              | 136592                     | 137512           | S | 306           | 100   |
|             |      |                                | 2              | 222078                     | 223007           |   | 309           | 99.53 |
|             |      |                                | 3              | 292559                     | 293446           |   | 295           | 100   |
|             |      |                                | 4              | 295023                     | 295952           |   | 309           | 99.53 |
|             | cox2 | cytochrome c oxidase subunit 2 | 1 <sup>b</sup> | 49153                      | 49567            | S | 138           | 92.52 |
|             |      |                                | 2 <sup>b</sup> | 158716                     | 159130           |   | 138           | 92.52 |
|             |      |                                | 3 <sup>c</sup> | 246972                     | 247562           |   | 196           | 76.69 |
|             |      |                                | 4 <sup>c</sup> | 303507                     | 304005           |   | 166           | 94.29 |
|             |      |                                | 5              | Ex-1 373903<br>Ex-2 376151 | 374290<br>376494 |   | 374291-376150 | 243   |
|             | cox3 | cytochrome c oxidase subunit 3 | 1              | 22616                      | 23413            | S | 265           | 98.71 |
|             |      |                                | 2              | 130801                     | 131598           |   | 265           | 98.71 |
|             |      |                                | 3              | 131761                     | 132558           |   | 265           | 98.71 |
|             |      |                                | 4              | 219422                     | 220219           |   | 265           | 98.87 |
| 5           |      |                                | 346092         | 346889                     | 265              |   | 98.71         |       |
| Complex V   | atp1 | ATP synthase F1 subunit alpha  | 1 <sup>b</sup> | 47970                      | 46459            | A | 503           | 97.62 |
|             |      |                                | 2              | 157460                     | 155865           |   | 531           | 97.81 |
|             |      |                                | 3              | 244265                     | 242628           |   | 545           | 97.63 |
|             |      |                                | 4              | 302324                     | 300807           |   | 505           | 97.77 |
|             |      |                                | 5              | 373812                     | 372253           |   | 519           | 97.62 |
|             | atp4 | ATP synthase F0 subunit b      | 1              | 67556                      | 67077            | A | 159           | 93.59 |
|             |      |                                | 2              | 179158                     | 178688           |   | 156           | 92.81 |
|             |      |                                | 3              | 251946                     | 251365           |   | 193           | 93.1  |
|             |      |                                | 4 <sup>b</sup> | 317401                     | 316922           |   | 159           | 92.86 |
|             |      |                                | 5 <sup>b</sup> | 388421                     | 387879           |   | 180           | 94.22 |
|             | atp6 | ATP synthase F0 subunit a      | 1              | 27408                      | 28214            | S | 268           | 99.58 |
|             |      |                                | 2              | 141973                     | 142650           |   | 225           | 100   |
|             |      |                                | 3              | 226885                     | 227562           |   | 225           | 100   |
|             |      |                                | 4              | 227649                     | 228326           |   | 225           | 100   |
|             |      |                                | 5              | 351147                     | 352238           |   | 363           | 99.21 |

|                   |                         |                               |                           |        |        |        |                              |       |       |       |
|-------------------|-------------------------|-------------------------------|---------------------------|--------|--------|--------|------------------------------|-------|-------|-------|
|                   | atp8                    | ATP synthase F0 subunit 8     | 1                         | 69721  | 69236  |        | A                            | 161   | 89.17 |       |
|                   |                         |                               | 2                         | 180048 | 179563 |        |                              | 161   | 89.1  |       |
|                   |                         |                               | 3                         | 318394 | 317828 |        |                              | 188   | 88.54 |       |
|                   | atp9                    | ATP synthase F0 subunit c     | 1                         | 33539  | 33264  |        | A                            | 91    | 97.47 |       |
|                   |                         |                               | 2                         | 149428 | 149180 |        |                              | 82    | 98.55 |       |
|                   |                         |                               | 3                         | 231683 | 231342 |        |                              | 113   | 97.5  |       |
|                   | atpB                    | ATP synthase CF1 subunit beta | SINGLE COPY               | Ex-1   | 203295 | 203804 | 203805-204403, 204551-205841 | S     | 310   |       |
|                   |                         |                               |                           | Ex-2   | 204404 | 204550 |                              |       |       |       |
|                   |                         |                               |                           | Ex-3   | 205842 | 206116 |                              |       |       |       |
|                   | Cytochrome C biogenesis | ccmC                          | ABC transporter subunit C | 1      | 75910  | 76716  |                              | S     | 268   | 97.67 |
| 2                 |                         |                               |                           | 184907 | 185713 |        | 268                          |       | 97.67 |       |
| 3                 |                         |                               |                           | 254150 | 254905 |        | 251                          |       | 97.49 |       |
| 4                 |                         |                               |                           | 328882 | 329838 |        | 318                          |       | 97.22 |       |
| 5                 |                         |                               |                           | 398681 | 399481 |        | 266                          |       | 96.07 |       |
| ccmF              |                         | haem lyase                    | 1 <sup>a</sup>            | Ex-1   | 52477  | 52618  | 52619-52942                  | S     | 161   | 92.5  |
|                   |                         |                               |                           | Ex-2   | 52943  | 53284  |                              |       |       |       |
|                   |                         |                               | 2 <sup>a</sup>            | Ex-1   | 163333 | 163474 | 163475-163798                |       | 161   | 92.5  |
|                   |                         |                               |                           | Ex-2   | 163799 | 164140 |                              |       |       |       |
|                   |                         |                               | 3                         | Ex-1   | 265781 | 266081 | 266082-266405, 266670-268309 |       | 391   | 92.64 |
|                   |                         |                               |                           | Ex-2   | 266406 | 266669 |                              |       |       |       |
|                   |                         |                               |                           | Ex-3   | 268310 | 268920 |                              |       |       |       |
|                   |                         |                               | 4 <sup>a</sup>            | Ex-1   | 306904 | 307045 | 307046-307369                |       | 161   | 92.5  |
|                   |                         |                               |                           | Ex-2   | 307370 | 307711 |                              |       |       |       |
|                   |                         |                               | 5 <sup>a</sup>            | Ex-1   | 377955 | 378096 | 378095-378420                |       | 161   | 92.5  |
| Ex-2              |                         | 378421                        |                           | 378762 |        |        |                              |       |       |       |
| Ribosomal protein |                         | rp15                          | ribosomal protein L5      | 1      | 139798 | 140352 |                              | S     | 184   | 97.83 |
|                   |                         |                               |                           | 2      | 140881 | 141435 |                              |       | 184   | 97.83 |
|                   |                         |                               |                           | 3      | 225930 | 226484 |                              |       | 184   | 97.83 |
|                   | 4                       |                               |                           | 356278 | 356832 |        | 184                          |       | 97.83 |       |
|                   | rp16                    | ribosomal protein L16         | 1 <sup>a</sup>            | 14772  | 15206  |        | S                            | 144   |       |       |
|                   |                         |                               | 2                         | 130192 | 130626 |        |                              | 144   |       |       |
|                   |                         |                               | 3 <sup>a</sup>            | 214756 | 215190 |        |                              | 144   |       |       |
|                   | rps2                    | ribosomal protein S2          | 1                         | 167418 | 168059 |        | S                            | 213   | 97.35 |       |
|                   |                         |                               | 2                         | 309768 | 310499 |        |                              | 243   | 97    |       |
|                   | rps3                    | ribosomal protein S3          | 1                         | 13337  | 14800  |        | S                            | 487   | 93    |       |
|                   |                         |                               | 2 <sup>a</sup>            | 129117 | 130220 |        |                              | 367   | 95.38 |       |
|                   |                         |                               | 3                         | 213321 | 214784 |        |                              | 487   | 93.02 |       |
|                   |                         |                               | 4                         | 344457 | 345950 |        |                              | 497   | 94.05 |       |
|                   | rps4                    | ribosomal protein S4          | 1                         | 87140  | 87952  |        | S                            | 270   | 98.77 |       |
|                   |                         |                               | 2                         | 193587 | 194399 |        |                              | 270   | 98.77 |       |
|                   |                         |                               | 3                         | 259282 | 260283 |        |                              | 333   | 97.2  |       |
|                   |                         |                               | 4                         | 395410 | 396060 |        |                              | 216   |       |       |
| rps11             | ribosomal protein S11   | SINGLE COPY                   | 190637                    | 191053 |        | S      | 138                          | 91.79 |       |       |
| rps12             | ribosomal               | 1                             | 80084                     | 79707  |        | A      | 125                          | 98.4  |       |       |

|                |                            |                                               |                          |        |        |     |     |       |       |
|----------------|----------------------------|-----------------------------------------------|--------------------------|--------|--------|-----|-----|-------|-------|
|                | protein S12                | 2 <sup>a</sup>                                | 84702                    | 84520  |        |     | 60  |       |       |
|                |                            | 3                                             | 196154                   | 195777 |        |     | 125 | 98.39 |       |
|                |                            | 4                                             | 261984                   | 261607 |        |     | 125 | 98.15 |       |
|                |                            | 5                                             | 391484                   | 391107 |        |     | 125 | 98.25 |       |
|                | rps13                      | ribosomal protein S13                         | 1                        | 93426  | 93076  |     | A   | 116   | 100   |
|                |                            |                                               | 2                        | 191393 | 191043 |     |     | 116   | 100   |
|                |                            |                                               | 3                        | 322407 | 322057 |     |     | 116   | 100   |
|                |                            |                                               | 4                        | 405701 | 405351 |     |     | 116   | 100   |
|                | rps14                      | ribosomal protein S14                         | 1                        | 140369 | 140671 |     | S   | 100   | 96    |
|                |                            |                                               | 2                        | 141452 | 141754 |     |     | 100   | 96    |
|                |                            |                                               | 3                        | 226501 | 226803 |     |     | 100   | 96    |
|                | rps19                      | ribosomal protein S19                         | SINGLE COPY              | 133480 | 133758 |     | S   | 92    | 92.39 |
|                |                            |                                               |                          |        |        |     |     |       |       |
| Other protein  | tatC                       | Sec-independent protein translocase component | 1 <sup>a</sup>           | 87017  | 86226  |     | A   | 263   | 96.88 |
|                |                            |                                               | 2 <sup>a</sup>           | 193508 | 192717 |     |     | 263   | 96.4  |
|                |                            |                                               | 3                        | 259288 | 258521 |     |     | 255   | 96.39 |
|                |                            |                                               | 4 <sup>a</sup>           | 324749 | 323958 |     |     | 263   | 97    |
|                |                            |                                               | 5                        | 395136 | 394279 |     |     | 285   | 94.78 |
| Pseudo gene    | ndhB                       | NADH-plastoquinone oxidoreductase subunit 2   | 1 <sup>a</sup>           | 19985  | 20590  |     | S   | 201   | 95.81 |
|                |                            |                                               | 2 <sup>b</sup>           | 66365  | 65750  |     | A   | 205   | 82.11 |
|                |                            |                                               | 3 <sup>a</sup>           | 126438 | 127043 |     | S   | 201   | 95.81 |
|                |                            |                                               | 4 <sup>a</sup>           | 128009 | 128614 |     |     | 201   | 95.81 |
|                |                            |                                               | 5 <sup>a</sup>           | 218041 | 218646 |     |     | 201   | 95.81 |
|                |                            |                                               | 6 <sup>a</sup>           | 343310 | 343915 |     |     | 201   | 96.43 |
|                | rpoB                       | RNA polymerase subunit beta                   | SINGLE COPY <sup>a</sup> | 187569 | 187775 |     | S   | 68    | 75    |
|                | rpoC1                      | RNA polymerase b'-subunit                     | SINGLE COPY <sup>c</sup> | 327981 | 328577 |     | S   | 198   | 53.57 |
|                | rps1                       | ribosomal protein S1                          | 1 <sup>a</sup>           | 88237  | 88773  |     | S   | 178   | 95.33 |
|                |                            |                                               | 2 <sup>a</sup>           | 194684 | 195073 |     |     | 129   |       |
|                | rpl2                       | ribosomal protein L2                          | SINGLE COPY <sup>b</sup> | 148842 | 149288 |     | S   | 148   | 95.8  |
|                | rps7                       | ribosomal protein S7                          | 1 <sup>a</sup>           | 56555  | 56112  |     | A   | 147   | 97.71 |
|                |                            |                                               | 2 <sup>a</sup>           | 167380 | 166937 |     |     | 147   | 97.44 |
| 3 <sup>a</sup> |                            |                                               | 270121                   | 269678 |        | 147 |     | 97.58 |       |
| 4 <sup>a</sup> |                            |                                               | 309660                   | 309217 |        | 147 |     | 97.58 |       |
| 5 <sup>a</sup> |                            |                                               | 382189                   | 381746 |        | 147 |     | 97.5  |       |
| ftsH           | cell division protein FTSH | SINGLE COPY <sup>c</sup>                      | 9526                     | 9149   |        | A   | 125 |       |       |

List of respiratory complex genes, ribosomal protein genes, other proteins and pseudo genes along with their co-ordinates, copy number, Exon and intron numbers and co-ordinates, presence in (+S/-A) strand, Protein length and percentage identity with *M.balbisiana* proteins are given. a-no start codon; b-no stop codon; c-no start and stop codon.

Table 3: *M.accuminata* mitochondrial gene content comparison with other model organisms used as reference in this study

|                         | Genes  | DH Pahang | Maize          | Rice           | Arabidopsis | Sugarbeet |
|-------------------------|--------|-----------|----------------|----------------|-------------|-----------|
| Complex I               | nad1   | +         | +, 2 exon 1    | +              | +           | +         |
|                         | nad2   | +         | +, 2 exons 4,5 | +, 2 exons 3-5 | +           | +         |
|                         | nad3   | +         | +              | +              | +           | +         |
|                         | nad4   | +         | +              | +              | +           | +         |
|                         | nad4L  | +         | +              | +              | +           | +         |
|                         | nad5   | +         | +              | +, 2 exon 1    | +           | +         |
|                         | nad6   | +         | +              | +              | +           | +         |
|                         | nad7   | +         | +              | +              | +           | +         |
|                         | nad9   | +         | +              | +              | +           | +         |
|                         | ndhB   | Ψ         | -              | -              | -           | -         |
| Complex II              | sdh2   | -         | -              | -              | -           | -         |
|                         | sdh3   | -         | -              | -              | -           | -         |
|                         | sdh4   | -         | -              | -              | Ψ           | -         |
| Complex III             | cob    | +         | +              | +              | +           | +         |
|                         | petB   | +         | -              | -              | -           | -         |
| Complex IV              | cox1   | +         | +              | +              | +           | +         |
|                         | cox2   | +         | +              | +              | +           | +         |
|                         | cox3   | +         | +              | +              | +           | +         |
| Complex V               | atp1   | +         | +              | +              | +           | +         |
|                         | atp4   | +         | +              | +              | +           | +         |
|                         | atp6   | +         | +              | +              | +           | +         |
|                         | atp8   | +         | +              | +              | +           | +         |
|                         | atp9   | +         | +              | +              | +           | +         |
|                         | atpB   | +         | -              | -              | -           | -         |
| Cytochrome C Biogenesis | ccmB   | -         | +              | +              | +           | +         |
|                         | ccmC   | +         | +              | +              | +           | Ψ         |
|                         | ccmF   | +         | +              | +              | -           | +         |
|                         | ccmFN1 | -         | -              | -              | +           | -         |
|                         | ccmFN2 | -         | -              | -              | +           | -         |
|                         | ccmFC  | -         | +              | +              | +           | +         |
|                         | ccmFC1 | -         | -              | -              | -           | -         |
|                         | ccmFC2 | -         | -              | -              | -           | -         |
| Ribosomal protein       | rps1   | Ψ         | +              | +              | -           | -         |
|                         | rps2   | +         | +              | +              | -           | -         |
|                         | rps2B  | -         | +              | -              | -           | -         |
|                         | rps3   | +         | +              | +              | +           | +         |
|                         | rps4   | +         | +              | +              | +           | +         |

|                |       |   |   |   |   |   |
|----------------|-------|---|---|---|---|---|
|                | rps7  | Ψ | + | + | + | + |
|                | rps8  | - | - | - | - | - |
|                | rps10 | - | - | - | - | - |
|                | rps11 | + | - | Ψ | - | - |
|                | rps12 | + | + | + | + | + |
|                | rps13 | + | + | + | - | + |
|                | rps14 | + | - | Ψ | Ψ | - |
|                | rps15 | - | - | - | - | - |
|                | rps16 | - | - | - | - | - |
|                | rps19 | + | - | + | Ψ | - |
|                | rpl2  | Ψ | - | + | + | + |
|                | rpl5  | + | - | + | - | - |
|                | rpl6  | - | - | - | + | - |
|                | rpl8  | - | - | - | - | - |
|                | rpl16 | + | + | - | + | - |
| Other proteins | ftsH  | Ψ | - | - | - | - |
|                | mat-r | - | + | + | + | + |
|                | mttB  | - | + | + | + | + |
|                | tatC  | + | - | - | + | - |
| rRNA           | rrn5  | + | + | + | + | + |
|                | rrn18 | - | + | + | + | + |
|                | rrn26 | + | + | + | + | + |
| RNA polymerase | rpoB  | Ψ | - | - | - | - |
|                | rpoC1 | Ψ | - | - | - | - |

List of core plant mitochondrial genes and their presence (+), absence (-) and pseudogenes (Ψ) of banana in comparison with other model plants used in this study are given.

Table 4: List of editing sites found in *M.accuminata* transcripts in comparison with *M.balbisiana*

| Genes                   | Gene editing position | Codon change |     | Amino acid change |      | Intron/exon |
|-------------------------|-----------------------|--------------|-----|-------------------|------|-------------|
|                         |                       | From         | To  | From              | To   |             |
| <b>AA editing sites</b> |                       |              |     |                   |      |             |
| ccmC                    | 76                    | CGC          | UGC | R                 | C    | EXON        |
| nad6                    | 289                   | CTT          | UTT | L                 | F    | EXON        |
|                         | 306                   | TTC          | TTU | F                 | F    | EXON        |
| rps1                    | 179                   | CCA          | CUA | P                 | L    | EXON        |
| rps12                   | 115                   | CGG          | UGG | R                 | W    | EXON        |
| petB                    | 166                   | CTC          | TTC | L                 | F    | EXON        |
| <b>BB editing sites</b> |                       |              |     |                   |      |             |
| atp1                    | 429                   | UCC          | UCU | S                 | S    | EXON        |
| atp4                    | 395                   | UCA          | UUA | S                 | L    | EXON        |
|                         | 416                   | ACC          | AUC | T                 | I    | EXON        |
| atp8                    | 47                    | UCA          | UUA | S                 | L    | EXON        |
|                         | 58                    | CUC          | UUC | L                 | F    | EXON        |
|                         | 123                   | CUC          | CUU | L                 | L    | EXON        |
| atp9                    | 504                   | UCC          | UCU | S                 | S    | EXON        |
|                         | 514                   | CGA          | UGA | R                 | STOP | EXON        |



|        |      |     |     |   |      |        |
|--------|------|-----|-----|---|------|--------|
|        | 518  | UCA | UUA | S | L    | EXON   |
|        | 604  | CGU | UGU | R | C    | EXON   |
|        | 627  | UUC | UUU | F | F    | EXON   |
|        | 634  | CAU | UAU | H | Y    | EXON   |
|        | 645  | UCC | UCU | S | S    | EXON   |
| ccmC   | 497  | UCU | UUU | S | F    | EXON   |
|        | 499  | CCU | UCU | P | S    | EXON   |
|        | 568  | CCU | UCU | P | S    | EXON   |
|        | 575  | CCC | CUC | P | L    | EXON   |
|        | 608  | CCC | CUC | P | L    | EXON   |
|        | 614  | UCC | UUC | S | F    | EXON   |
| cob    | 923  | GCC | GUC | A | V    | EXON   |
| cox1   | 1982 | UCU | UUU | S | F    | EXON   |
|        | 2053 | CCA | UCA | P | S    | EXON   |
| cox3   | 2227 | CUU | UUU | L | F    | EXON   |
|        | 2366 | UCG | UUG | S | L    | EXON   |
|        | 2376 | CCC | CCU | P | P    | EXON   |
| nad4L  | 6315 | AGC | AGU | S | S    | INTRON |
| nad5   | 1363 | CUC | UUC | L | F    | EXON   |
|        | 1441 | CAA | UAA | Q | STOP | INTRON |
| nad9   | 356  | UCU | UUU | S | F    | EXON   |
|        | 368  | UCC | UUC | S | F    | EXON   |
|        | 398  | UCA | UUA | S | L    | EXON   |
|        | 406  | CAU | UAU | H | Y    | EXON   |
| rps 2  | 60   | GUC | GUU | V | V    | EXON   |
| rps 7  | 215  | CCA | CUA | P | L    | EXON   |
| rps 12 | 115  | CGG | UGG | R | W    | EXON   |
|        | 156  | UUC | UUU | F | F    | EXON   |
| rps 13 | 342  | CUC | CUU | L | L    | EXON   |
|        | 373  | CGC | UGC | R | C    | EXON   |
| petB   | 166  | CTC | TTC | L | F    | EXON   |
| rpoB   | 991  | CTA | TTA | L | L    | EXON   |
| tatC   | 235  | CCG | TCG | P | S    | EXON   |

List of genes and their position of editing sites with corresponding amino acid changes and their position in the gene (EXON/INTRON) are given.
